# Supplementary material for: Surface-plasmon-enhanced ethanol electrocatalysis and enhancement mechanism of nanoporous AuPd with wide-spectrum response characteristics under visible light irradiation
Source: Royal Society of Chemistry journal article supplement (doi:10.1039/d3ta02272b), 2023-01-01
Supplement: d3ta02272b1.pdf [file d3ta02272b1.pdf]

## Supplementary Information

# Surface plasmon-enhanced ethanol electrocatalysis and enhancement mechanism of nanoporous AuPd with wide spectrum response characteristics under visible light irradiation

Cuilan Tang,<sup>a</sup> Guo Chen,<sup>a</sup> Yansong Liu,<sup>a</sup> Jian Wang,<sup>b</sup> Xiaoshan He,<sup>a</sup> Chunping Xie,<sup>a</sup> Zhibing He,<sup>\*,a</sup>  
<sup>a</sup> and Jinglin Huang <sup>\*,a</sup>

<sup>a</sup>Laser Fusion Research Center, China Academy of Engineering Physics, Mianyang 621900, P. R. China

<sup>b</sup>Joint Laboratory for Extreme Conditions Matter Properties, School of Mathematics and Physics, Southwest University of Science and Technology, Mianyang 621010, P. R. China

\*Corresponding Author, Email: hezhibing802@163.com, jinglinhuang04@163.com

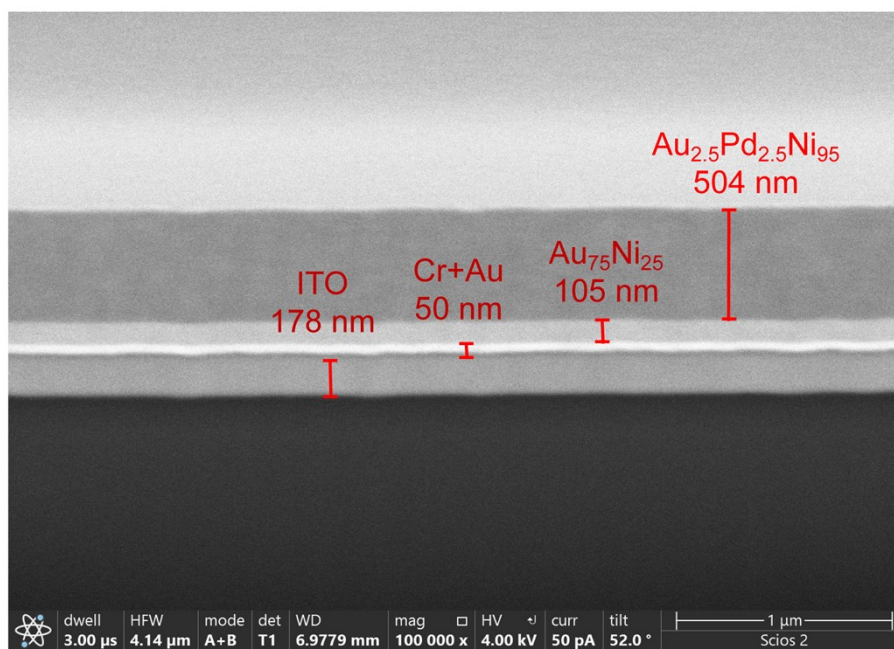

**Figure S1.** SEM of cross-sectional structure of Au<sub>2.5</sub>Pd<sub>2.5</sub>Ni<sub>95</sub> precursor.

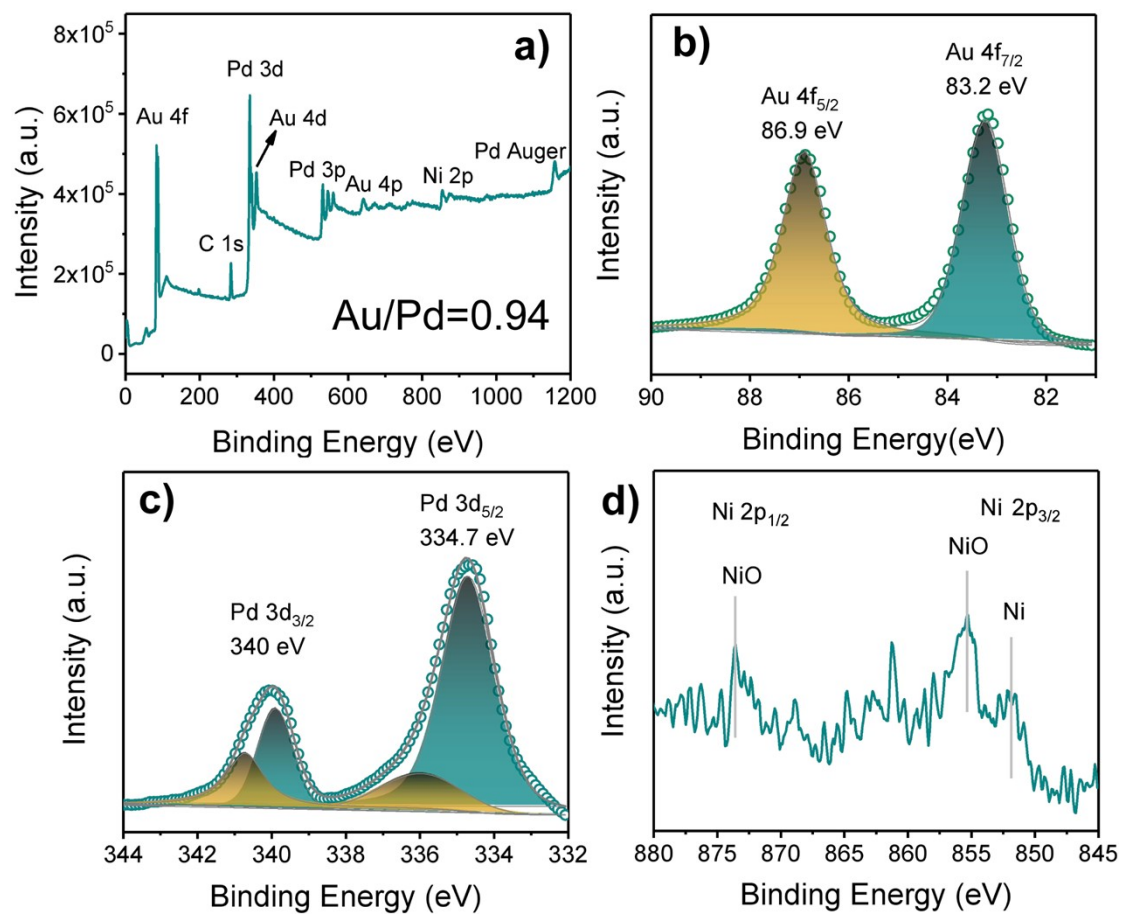

**Figure S2.** XPS spectra of NP AuPd. (a) XPS survey spectra. Narrow scan spectra of (b) Au 4f, (c) Pd 3d, (d) Ni 2p.

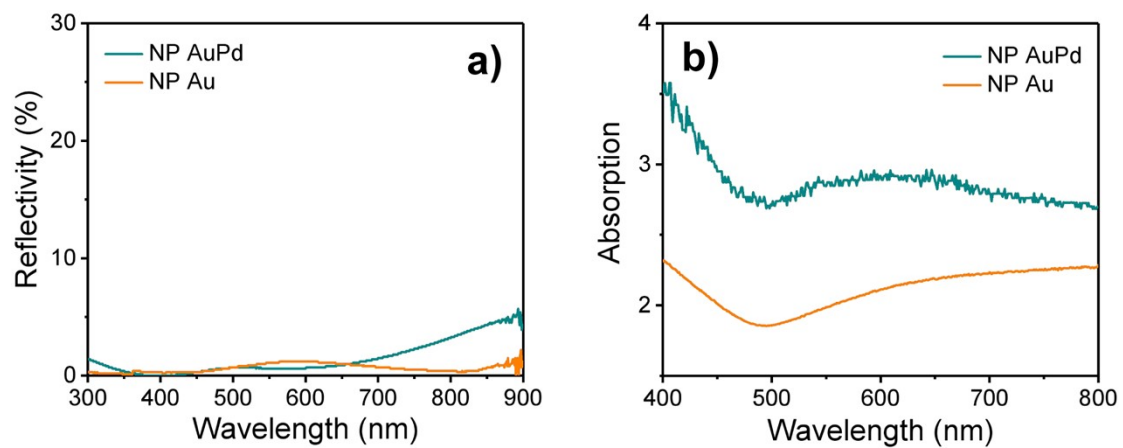

**Figure S3.** (a) Reflection spectra of the NP AuPd prepared by 100 nm  $\text{Au}_{25}\text{Ni}_{75}$  transition layer and 500 nm  $\text{Au}_{2.5}\text{Pd}_{2.5}\text{Ni}_{95}$  precursor. (b) Absorption spectra of the NP AuPd prepared by 25 nm  $\text{Au}_{25}\text{Ni}_{75}$  and 300 nm  $\text{Au}_{2.5}\text{Pd}_{2.5}\text{Ni}_{95}$  precursor.

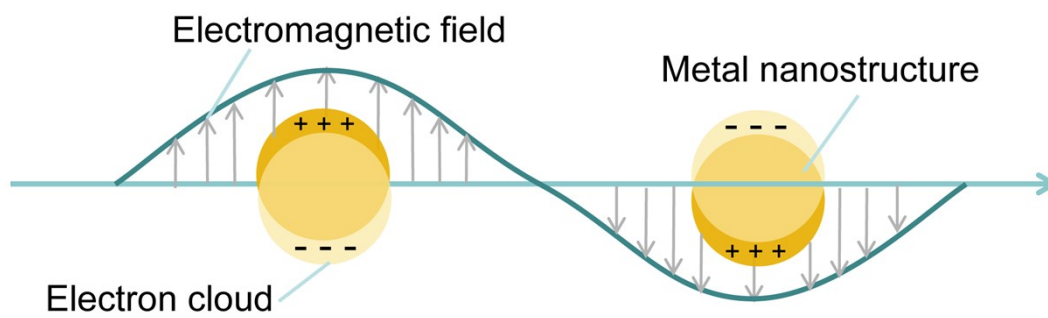

**Figure S4.** Schematic diagram of LSPR effect of metal nanostructure.

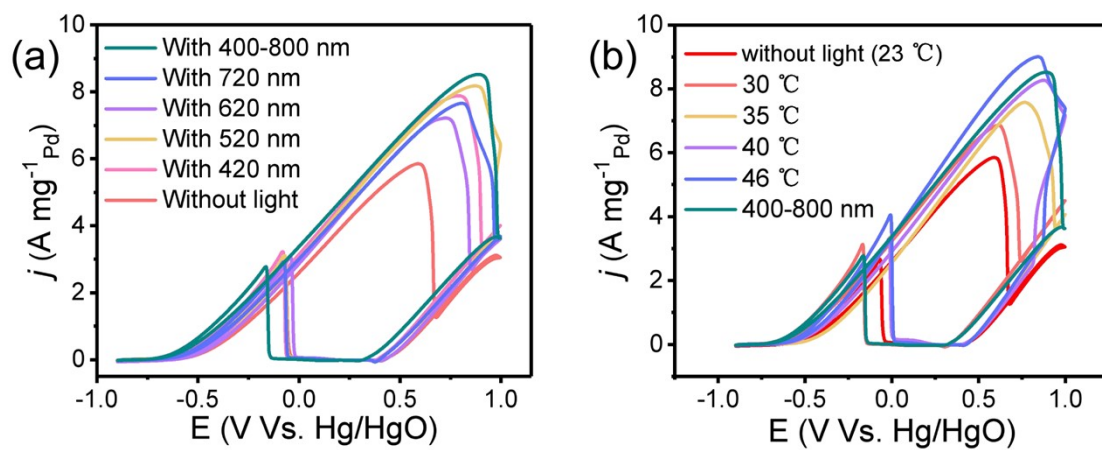

**Figure S5.** Original CV curves without iR compensation of NP AuPd towards EOR (a) under different light wavelength and (b) at different solution temperatures without visible light illumination.

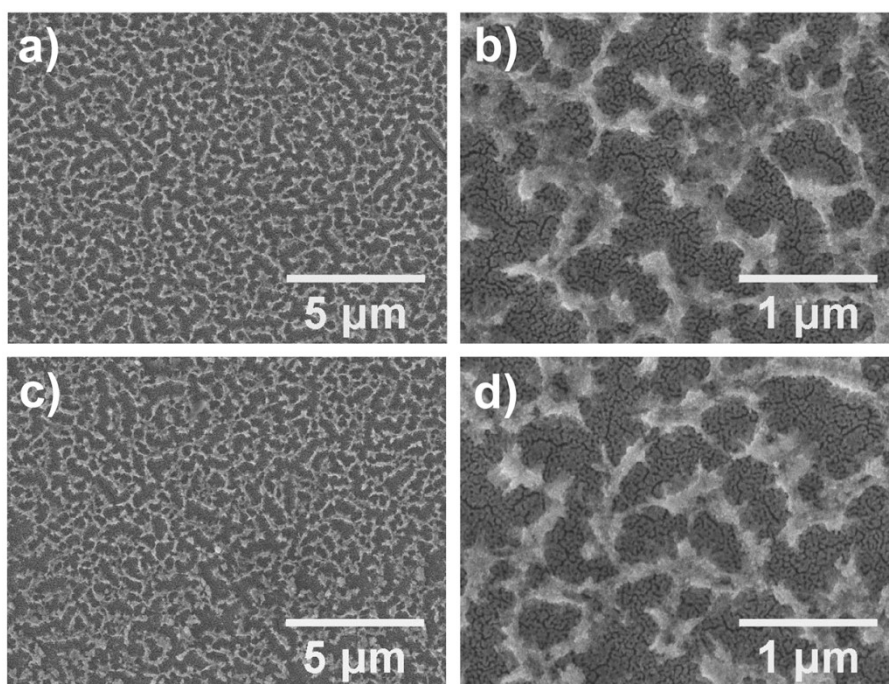

**Figure S6.** Surface SEM images (a-b) before and (c-d) after long-term 6000 s CA test of NP AuPd.

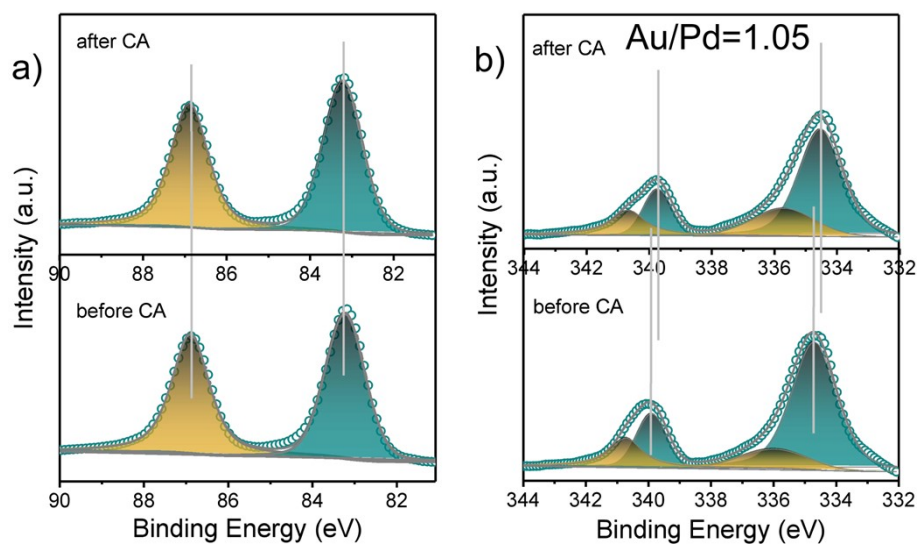

**Figure S7.** XPS spectra of (e) Au 4f and (f) Pd 3d of NP AuPd after long-term CA.



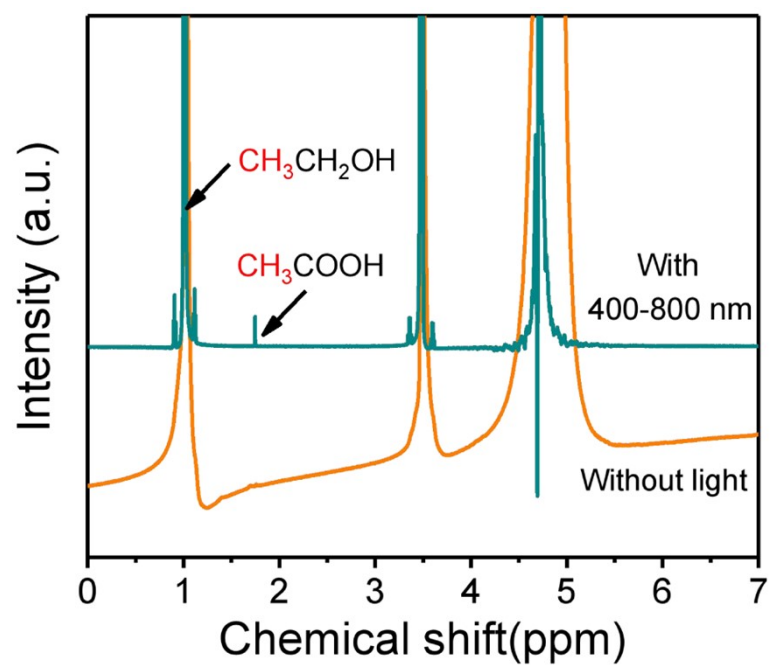

**Figure S8.** <sup>1</sup>H NMR analysis of the electrolytes after CA test for NP AuPd with and without visible light illumination. The total charge during CA test is 9 C.

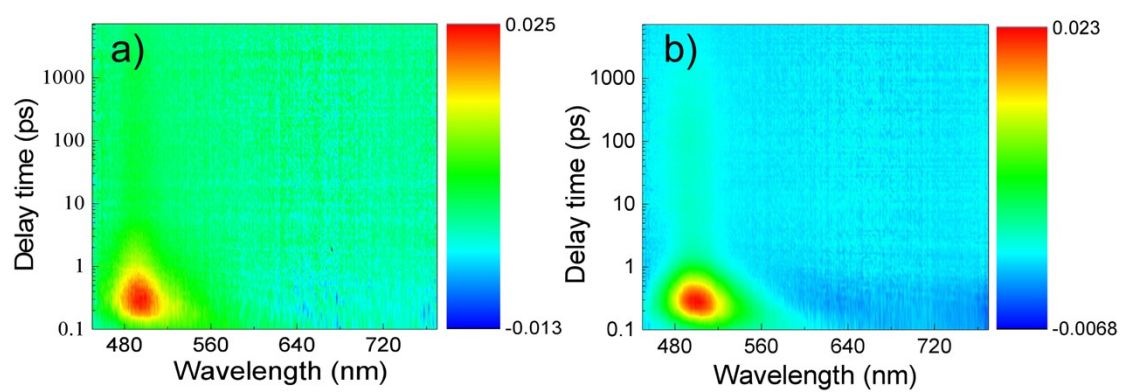

**Figure S9.** 2D pseudocolor TA spectra of (a) NP Au and (b) NP AuPd after the excitation with a 400 nm laser pulse.

**Table S1.** Deposition parameters of the Au–Ag–Ni alloys film

| Sample layer                                         | element | target power (W) | deposition rate (nm/s) <sup>a)</sup> | deposition time (s) | thickness (nm) <sup>b)</sup> | mass of Pd (mg cm <sup>-2</sup> ) <sup>c)</sup> |
|------------------------------------------------------|---------|------------------|--------------------------------------|---------------------|------------------------------|-------------------------------------------------|
| Au <sub>2.5</sub> Pd <sub>2.5</sub> Ni <sub>95</sub> | Au      | 6                | 0.021                                | 880                 | 500                          | 0.019                                           |
|                                                      | Pd      | 9                | 0.020                                |                     |                              |                                                 |
|                                                      | Ni      | 240              | 0.528                                |                     |                              |                                                 |
| Au <sub>25</sub> Ni <sub>75</sub>                    | Au      | 38               | 0.135                                | 249                 | 100                          | -                                               |
|                                                      | Ni      | 120              | 0.264                                |                     |                              |                                                 |
| Au                                                   | Au      | 120              | 0.427                                | 70                  | 30                           |                                                 |
| Cr                                                   | Cr      | 150              | 0.301                                | 50                  | 15                           |                                                 |

<sup>a)</sup> The deposition rates were determined by measuring the thickness of calibration samples by a stylus profiler.

<sup>b)</sup> The thickness data were calculated using data of deposition rate and deposition time.

<sup>c)</sup> The mass were calculated by equation S1 and S2:

$$m = V \times \rho \quad (S1)$$

Where, m, V, and  $\rho$  are the mass, volume, and density of Pd atom.

$$V = S \times d = 1 \times v \times t \quad (S2)$$

Where, S, d, v, and t are the effective geometric area (1 cm<sup>2</sup>), thickness, deposition rate and deposition time.
